# Supplementary material
Source: HighWire-hosted journal article supplement (http://heartasia.bmj.com/highwire/filestream/136935/field_highwire_adjunct_files/0/heartasia-2014-010540supp.pdf)

**Supplementary table 1: Different genotypes of Apo B VNTR based on five-allelic model**

| <b>S. No</b> | <b>Genotype</b> | <b>Patients<br/>(n=230)</b> | <b>Controls<br/>(n=300)</b> | <b>p value</b> |
|--------------|-----------------|-----------------------------|-----------------------------|----------------|
| 1            | 1/1             | 1(0.4%)                     | 2(0.6%)                     | ns             |
| 2            | 1/2             | 6(2.6%)                     | 13(4.3%)                    | ns             |
| 3            | 1/3             | 3(1.3%)                     | 16(5.3%)                    | ns             |
| 4            | 1/4             | 3(1.3%)                     | 3(1.0%)                     | ns             |
| 5            | 1/5             | 22(9.6%)                    | 19(6.3%)                    | ns             |
| 6            | 2/2             | 11(4.8%)                    | 26(8.6%)                    | ns             |
| 7            | 2/3             | 8(3.5%)                     | 48(16.0%)                   | 0.0001         |
| 8            | 2/4             | 6(2.6%)                     | 12(4.0%)                    | ns             |
| 9            | 2/5             | 19(8.3%)                    | 6(2.0%)                     | 0.0001         |
| 10           | 3/3             | 44(19.1%)                   | 64(21.3%)                   | ns             |
| 11           | 3/4             | 19(8.3%)                    | 18(6.0%)                    | ns             |
| 12           | 3/5             | 31(13.5%)                   | 35(11.6%)                   | ns             |
| 13           | 4/4             | 25(10.9%)                   | 18(6.0%)                    | ns             |
| 14           | 4/5             | 12(5.2%)                    | 9(3.0%)                     | ns             |
| 15           | 5/5             | 20(8.7 %)                   | 11(3.6 %)                   | 0.02           |

**Supplementary Figure 1: Different alleles at ApoB 3' HVR with sizing ladder.**

Lane 1: Allelic ladder for ApoB3' HVR, Lane 2–6: different samples showing various alleles of ApoB 3' HVR and lane 7: 50 bp ladder.

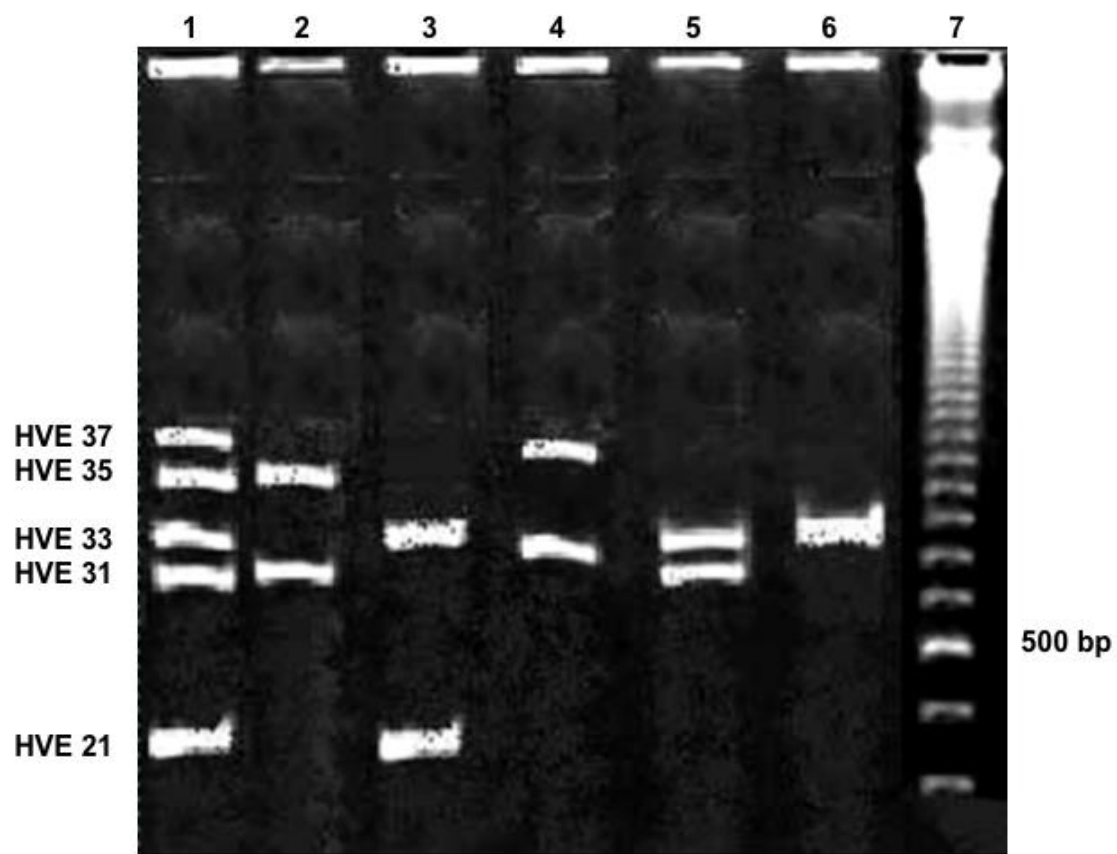

Supplement: heartasia-2014-010540supp.pdf [file heartasia-2014-010540supp.pdf]
